# Supplementary material
Source: Royal Society of Chemistry journal article supplement (doi:10.1039/b107852f), 2001-11-22
Supplement: b107852f.doc [file b107852f.doc]

# Intermolecular hydroacylation of acrylate esters: A new route to 1,4-dicarbonyls

Michael C. Willis,*and Selma Sapmaz

Department of Chemistry, University of Bath, Bath, BA2 7AY, UK. Fax: (44) 1225 826231; Tel: (44) 1225 826568; E-mail: m.c.willis@bath.ac.uk

## Supplementary Information

### General Experimental

1H NMR spectra were recorded on JEOL 270 EX, JEOL 400 EX or Bruker AM-300 spectrometers at 270 MHz, 400 MHz and 300 MHz respectively. Residual protic solvent CHCl3 (H = 7.26 ppm) or TMS (H = 0 ppm) were used as internal references. Coupling constants were measured in Hz. 13C spectra were recorded in CDCl3, unless otherwise stated, at 100 MHz, 75 MHz or 67.5 MHz on JEOL 400 EX, Bruker AM-300 and JEOL 270 EX spectrometers respectively, using the resonance of CDCl3 (C = t, 77 ppm) as the internal reference. Infra red spectra were recorded in the range of 4000-600 cm-1 on a Perkin Elmer FT 1000 spectrometer with internal calibration. Melting points were measured on a Büchi 535 melting point apparatus and are uncorrected.

Analytical thin layer chromatography was carried out using glass backed plates coated with Merck Kieselgel 60 GF254 or aluminium backed plates coated with Merck G/UV254. Plates were visualised under UV light (at 254 nm) or by staining with potassium permanganate, vanillin or cerium ammonium molybdate followed by heating. Flash chromatography was carried out using either Merck 60 H silica or Merck Florisil®. Samples were pre-absorbed on silica or used as saturated solutions in an appropriate solvent.

Tetrahydrofuran and ether were distilled from sodium benzophenone ketyl, toluene from sodium and dichloromethane and *N*,*N*-dimethylformamide from CaH2 all under nitrogen. Petrol refers to light petroleum, bp 40-60 °C, ether refers to diethyl ether.

Unless otherwise stated, commercially available starting materials were used throughout without any further purification. Reactions requiring anhydrous conditions were performed under nitrogen in oven or flame dried apparatus.

### Preparation of Picolyl-Imines

The following imines are known compounds and gave data consistent with that reported in the literature:

Benzylidene-(3-methyl-pyridin-2-yl)-imine[[1]](#endnote-2) and 4-nitrobenzylidene-(pyridin-2-yl)-imine.[[2]](#endnote-3)

The preparation of **4-bromobenzylidene-(3-methyl-pyridin-2-yl)-imine** is a representative procedure (followed by selected data for the remaining imines):

4-Bromo-benzaldehyde (2.89 g, 15.63 mmol) was added to a stirred solution of *p*TSA (0.5 mol %, 3 mg) in toluene (15 mL) at room temperature. 2-Amino-3-picoline (1.77 g, 15.63 mmol) was added and the mixture was refluxed overnight in a Dean-Stark apparatus. When no further evolution of water was observed the reaction mixture was cooled and concentrated *in-vacuo*. The residue was purified by distillation under reduced pressure to give the *imine* (3.87 g, 91%) as a pale yellow oil which crystallised as needles on standing, mp 26-27 °C; bp 170-172 °C/1 mm Hg; max(film)/cm-1 2972, 2864, 1734, 1645, 1367, 850; H (300 MHz; CDCl3) 9.01 (1 H, s, H-imine), 8.29 (1 H, dd, *J* 4.6, 1.1, 1  pic), 7.82 (2 H, d, *J* 8.2, 2  Ph), 7.56 (2 H, d, *J* 8.2, 2  Ph), 7.49 (1 H, dd, *J* 7.4, 1.1, 1  pic), 7.03 (1 H, dd, *J* 7.4, 4.6, 1  pic), 2.41 (3 H, s, CH3); C(100 MHz; CDCl3) 159.14, 157.94, 145.11, 137.90, 134.11, 130.91 (2 CH), 129.65 (2 CH), 127.92, 125.20, 121.04, 16.04.

# 4-Cyanobenzylidene-(3-methyl-pyridin-2-yl)-imine

#

4-Cyanobenzaldehyde (0.37 g, 2.86 mmol), *p*TSA (2 mg), toluene (15 mL) and 2-amino-3-picoline (0.31, 2.86 mmol) gave after crystallisation the *imine* (0.44 g, 64 %) as a pale yellow solid, mp 82-83 °C (from CHCl3-hexane); max(film)/cm-1 2973, 2925, 2865, 1734, 1636, 1539, 1470, 900; H (300 MHz; CDCl3) 9.09 (1 H, s, H-imine), 8.28 (1 H, dd, *J* 4.6, 1.1, 1  pic), 8.05 (2 H, d, *J* 8.2, 2  Ph), 7.72 (2 H, d, *J* 8.2, 2  Ph), 7.55 (1 H, dd, *J* 7.4, 1.1, 1  pic), 7.10 (1 H, dd, *J* 7.4, 4.6, 1  pic), 2.41 (3 H, s, CH3); C(100 MHz; CDCl3) 159.13, 158.11, 146.06, 139.05, 132.33 (2 CH), 129.48 (2 CH), 122.64, 118.36, 114.50, 17.44.

# 4-Methoxybenzylidene-(3-methyl-pyridin-2-yl)-imine

#

4-Methoxybenzaldehyde (1.90 g, 14.00 mmol), *p*TSA (2 mg), toluene (15 mL) and 2-amino-3-picoline (1.51 g, 14.00 mmol) gave after distillation under reduced pressure the *imine* (2.51 g, 89 %) as a pale green oil, bp 168-170 °C/ 1 mm Hg; max(film)/cm-1 2910, 2842, 2721, 1681, 1620, 1579, 1460, 1150, 1025, 822, 7740; H (300 MHz; CDCl3) 9.01 (1 H, s, H-imine), 8.29 (1 H, dd, *J* 4.6, 1.1, 1  pic), 7.96 (2 H, d, *J* 8.2, 2  Ph), 7.52 (1 H, dd, *J* 7.4, 1.1, 1  pic), 7.10 (1 H, dd, *J* 7.4, 4.6, 1  pic), 6.99 (2 H, d, *J* 8.2, 2  Ph), 3.87 (3 H, s, OCH3), 2.46 (3 H, s, CH3); C(100 MHz; CDCl3) 162.92, 161.19, 160.20, 146.49, 139.11, 131.59 (2 CH), 129.76, 128.93, 121.80, 114.99 (2 CH), 55.94, 17.85.

# 4-Methylbenzylidene-(3-methyl-pyridin-2-yl)-imine

#

4-Methylbenzaldehyde (1.73 g, 14.00 mmol), *p*TSA (2 mg), toluene (15 mL) and 2-amino-3-picoline (1.51 g, 14.00 mmol) gave after distillation under reduced pressure the *imine* (2.40 g, 82 %) as a pale yellow oil, bp 170 °C/ 1 mm Hg; max(film)/cm-1 2972, 2860, 1738, 1646, 1598, 1452, 1366, 896, 816; H (300 MHz; C6D6) 9.46 (1 H, s, H-imine), 8.39 (1 H, dd, *J* 4.6, 1.1, 1  pic), 7.92 (2 H, d, *J* 8.2, 2  Ar), 7.19 (1 H, dd, *J* 7.4, 1.1, 1  pic), 7.05 (2 H, d, *J* 8.2, 2  Ph), 6.80 (1 H, dd, *J* 7.4, 4.6, 1  pic), 2.47 (3 H, s, CH3), 2.11 (3 H, s, CH3); C(100 MHz; C6D6) 162.00, 160.11, 146.94, 142.41, 139.11, 134.92, 130.79 (4 CH), 129.59, 122.31, 21.90, 17.99.

# (3-Methyl-pyridin-2-yl)-(naphthalen-2-ylmethylene)-imine

#

2-Naphthaldehyde (1.40g, 8.97 mmol), *p*TSA (2 mg), toluene (15 mL) and 2-amino-3-picoline (1.01 g, 8.97 mmol) gave after distillation under reduced pressure the *imine* (1.96 g, 89 %) as an oil which crystallised to a white solid on standing, mp 65-66 °C; bp 170 °C/ 1 mm Hg; max(film)/cm-1 3067, 3026, 2824, 1684, 1614, 1592, 1574, 1456, 820, 748; H (300 MHz; C6D6) 9.11 (1 H, s, H-imine), 8.22 (1 H, dd, *J* 4.6, 1.1, 1  pic), 8.15 (2 H, d, *J* 8.2, 2  nap), 7.85-7.72 (3 H, m, 2  nap and 1  pic), 7.47-7.36 (3H, m, 3  nap), 6.95 (1 H, dd, *J* 7.4, 4.6, 1  pic), 2.39 (3 H, s, CH3); C(100 MHz; C6D6) 162.24, 160.18, 146.87, 139.55, 135.90, 134.75, 133.77, 133.04, 129.6 (2 CH), 129.58, 129.22, 128.59 (2 CH), 124.86, 122.54, 18.17.

# (3-Methyl-pyrin-2-yl)-[4-(3’methyl-pyridin-2’-yl)iminomethyl-benzylidene]-imine

#

Benzene-1,4-dicarboxaldehyde (1.07 g, 8.04 mmol), *p*TSA (4 mg), toluene (15 mL) and 2-amino-3-picoline (1.74, 16.08 mmol) gave after crystallisation the *imine* (1.83g, 73 %) as bright yellow needles, mp 141-142 °C (from CHCl3-hexane); max(film)/cm-1 2972, 1738, 1646, 1598, 1366, 896; H (300 MHz; CDCl3) 9.15 (2 H, s, 2 H-imine), 8.32 (2 H, dd, *J* 4.6, 1.1, 2  pic), 8.11 (4 H, s, 4  Ph), 7.55 (2 H, dd, *J* 7.4, 1.1, 2  pic), 7.11 (2 H, dd, *J* 7.4, 4.6, 2  pic), 2.49 (6H, s, 2 CH3); C(100 MHz; CDCl3) 161.19 (2 C), 159.55 (2 C), 146.60, 139.42, 139.39 (2 C), 130.07 (4 C), 129.58 (2 C), 122.57, 17.82.

### Hydroacylation Reactions

The following hydroacylation adducts are known compounds and gave data consistent with that reported in the literature:

Methyl 4-oxo-4-phenylbutanoate,[[3]](#endnote-4) tbutyl 4-oxo-4-phenylbutanoate,[[4]](#endnote-5) *N*,*N*-dimethyl 4-oxo-4-phenylbutanamide,[[5]](#endnote-6) methyl 3-methyl-4-oxo-4-phenylbutanoate,[[6]](#endnote-7) methyl 3-phenyl-4-oxo-4-phenylbutanoate,[[7]](#endnote-8) methyl 2-methyl-4-oxo-4-phenylbutanoate,[[8]](#endnote-9) methyl 4-(4’-nitrophenyl)-4-oxobutanaote,[[9]](#endnote-10) methyl 4-(4’-cyanophenyl)-4-oxobutanaote,[[10]](#endnote-11) methyl 4-(4’-methoxyphenyl)-4-oxobutanoate,[[11]](#endnote-12) methyl 4-(4’-methylphenyl)-4-oxobutanaote,[[12]](#endnote-13) methyl 4-(4’-bromophenyl)-4-oxobutanaote[[13]](#endnote-14) and methyl 4-(2-naphthyl)-4-oxobutanoate.[[14]](#endnote-15)

The preparation of **methyl** **4-[4-(3-methoxycarbonyl-propionyl)-phenyl]-4-oxobutanoate** is a representative procedure (followed by selected data for remaining adducts):

A solution of imine **2** (282 mg, 1.79 mmol) in THF (1 mL) was added to a solution of RhCl(PPh3)3 (167 mg, 10 mol %) in THF (1 mL) at room temperature and the mixture stirred for 1 h. Methyl acrylate (480 L, 5.36 mmol, 3 eq) in THF (2 mL) was added and the reaction vessel flushed with argon. The reaction tube was sealed and then heated at 135 °C for 6 h. The reaction was cooled to room temperature, diluted with EtOAc (20 mL), poured into aqueous HCl (1 M, 20 mL) and extracted with EtOAc (3  20 mL). The organic portions were washed with brine (20 mL), dried (MgSO4) and evaporated *in-vacuo*. The residue was purified by flash chromatography (SiO2, 25% EtOAc-petrol) to give **3** (212 mg, 78 %) as pale yellow plates, mp 95 °C (from CHCl3-hexane); max(film)/cm-1 3061, 3030, 2997, 2918, 2842, 2727, 1756, 1718, 1672, 1622, 1580, 1462, 1216, 759; H (300 MHz; CDCl3) 8.01 (4 H, s, 4  Ph), 3.65 (6H, s, 2  MeO), 3.29 (4 H, t, *J* 6.4, 2  CH2), 2.70 (4 H, t, *J* 6.4, 2  CH2CO2Me); C (CDCl3) 197.93 (2 keto), 173.52 (2 esters), 140.12 (2 C), 128.65 (4 C), 52.28 (2 C), 34.14 (2 C), 28.28 (4 C).

# *N*-Methyl-3-[(3-methyl-pyridin-2-ylamino)-phenyl-methylene]-pyrrolidine-2,5-dione

#

Benzylidene-(3-methyl-pyridin-2-yl)-imine (134 mg, 0.73 mmol) in THF (1 mL), Wilkinson’s catalyst (66 mg, 10 mol %) in THF (1 mL) and methyl maleimide (272 mg, 2.19 mmol, 3 eq) in THF (2 mL) (6 h at 135 °C) gave the *enamine* (175 mg, 81 %) as a yellow solid, mp 117-118 °C (from CHCl3-hexane); max(film)/cm-1 2994, 2930, 2876, 2838, 1654, 1616, 1564, 1549, 1452, 720; H (300 MHz; C6D6) 10.92 (1 H, s, N-H), 7.62 (1 H, dd, *J* 4.6, 1.1, 1  pic), 7.11-7.05 (5 H, m, 5  Ph), 6.75 (1 H, dd, *J* 7.4, 1.1, 1  pic), 6.19 (1 H, dd, *J* 7.4, 4.6, 1  pic), 2.75 (3 H, s, N-Me), 2.68 (2 H, s, CH2), 2.13 (3 H, s, CH3); C(100 MHz; C6D6) 173.87, 173.23, 152.73, 151.24, 145.87, 138.41, 137.17, 128.00 (5 C), 121.95, 117.91, 99.83, 34.04, 24.22, 17.62.

1. **References**

   ? C. H. Jun, *Bull. Korean Chem. Soc.*, 1990, **11**, 187. [↑](#endnote-ref-2)
2. A. Albinati, C. Arz, and P. S. Pregosin, *J. Organomet. Chem.*, 1987, **335**, 379. [↑](#endnote-ref-3)
3. I. Rotrekl, L. Vyklicky, and D. Dvorak, *J. Organomet. Chem.*, 2001, **617-618**, 329. [↑](#endnote-ref-4)
4. S. Pavlov, M. Bogavac, and V. Arsenijevic, *Bull. Soc. Chim. Fr.*, 1974, 2985. [↑](#endnote-ref-5)
5. I. G. Tishchenko, O. G. Kulinkovich, and N. V. Masalov, *Synthesis*, 1982, 268. [↑](#endnote-ref-6)
6. C. Kashima, Y. Shirahata, and Y. Tsukamoto, *Heterocycles*, 2001, **54**, 309. [↑](#endnote-ref-7)
7. M. Abe and A. Oku, *J. Org. Chem.*, 1995, **60**, 3065. [↑](#endnote-ref-8)
8. E. Nakamura, S. Aoki, K. Sekiya, H. Oshino, and I. Kuwajima, *J. Am. Chem. Soc.*, 1987, **109**, 8056. [↑](#endnote-ref-9)
9. C. W. Buss, P. L. Coe, and J. C. Tatlow, *J. Fluorine Chem.*, 1997, **84**, 119. [↑](#endnote-ref-10)
10. M. V. Bhatt, M. Ravindranathan, V. Somayaji, and G. V. Rao, *J. Org. Chem.*, 1984, **49**, 3170. [↑](#endnote-ref-11)
11. D. L. Boger and R. J. Mathvink, *J. Org. Chem.*, 1989, **54**, 1777. [↑](#endnote-ref-12)
12. R. B. Mane and G. S. K. Rao, *J. Chem. Soc., Perkin Trans. 1*, 1975, 1235. [↑](#endnote-ref-13)
13. M. A. Sierra, J. C. del Amo, M. J. Mancheno, and M. Gomez-Gallego, *J. Am. Chem. Soc.*, 2001, **123**, 851. [↑](#endnote-ref-14)
14. A. H. Jackson, P. V. R. Shannon and P. W. Taylor, *J. Chem. Soc., Perkin Trans*., *II*, 1981, 286. [↑](#endnote-ref-15)
